# Supplementary material
Source: Springer Nature journal article supplement (http://www.springermedizin.de/resource/supplementary/13014_2009_217_MOESM2_ESM.pdf/9633172)

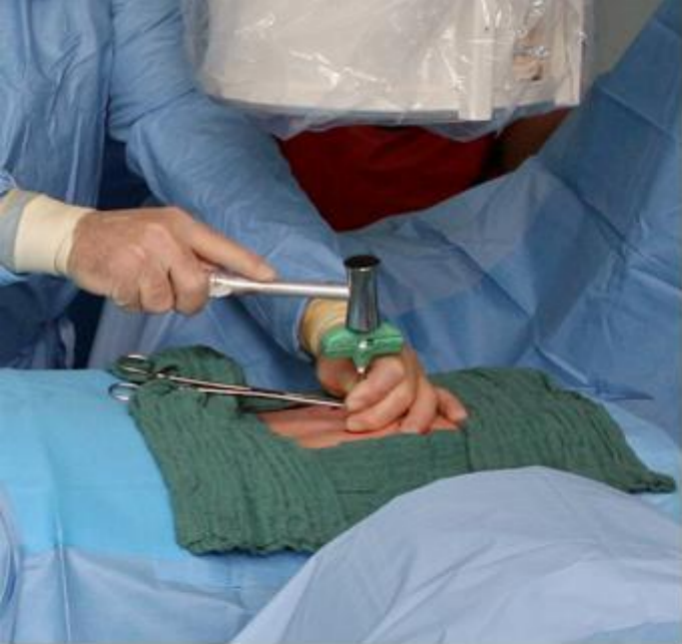

Supplement: MOESM2 [file 9633172]
